# Supplementary material for: FARSB Facilitates Hepatocellular Carcinoma Progression by Activating the mTORC1 Signaling Pathway
Source: MDPI journal article supplement (doi:10.3390/ijms242316709), 2023-11-24
Supplement: s1 [file s1]

Table S1 Baseline characteristics of patients whose samples were used in the tissue microarray

| <b>Clinical information</b> | <b>N(%)</b>                     |
|-----------------------------|---------------------------------|
| No. of patients             | 65                              |
| <b>Age ,yr</b>              | <b>59.2 ± 10.3</b>              |
| <b>Gender (male/female)</b> | <b>42/21</b>                    |
| <b>Histology</b>            | <b>Hepatocellular carcinoma</b> |
| <b>Stage</b>                |                                 |
| I                           | 5 (7.7%)                        |
| II                          | 15 (23.1%)                      |
| III                         | 33 (50.8%)                      |
| IV                          | 12 (18.5%)                      |
| <b>T stage</b>              |                                 |
| T1                          | 3 (4.6%)                        |
| T2                          | 13 (20%)                        |
| T3                          | 38 (58.5%)                      |
| T4                          | 11 (16.9%)                      |
| <b>Lymph nodes</b>          |                                 |
| N0                          | 20 (30.8%)                      |
| N1                          | 12 (18.5%)                      |
| N2                          | 18 (27.7%)                      |
| N3                          | 15 (23.1%)                      |
| <b>Metastasis</b>           |                                 |
| M0                          | 52 (80%)                        |
| M1                          | 13 ((20%)                       |
| <b>Grade</b>                |                                 |
| G2                          | 13 (20%)                        |
| G2-3                        | 14 (21.5%)                      |
| G3                          | 31 (47.7%)                      |
| G3-4                        | 7 (10.8%)                       |
