# Supplementary material for: FARSB Facilitates Hepatocellular Carcinoma Progression by Activating the mTORC1 Signaling Pathway
Source: MDPI journal article supplement (doi:10.3390/ijms242316709), 2023-11-24
Supplement: s1 [file s1]

| Gene    | Primer  | Sequences                       |
|---------|---------|---------------------------------|
| β-actin | Forward | 5'- CCTGGCACCCAGCACAAT-3'       |
|         | Reverse | 5'-GGGCCGGACTCGTCATAC-3'        |
| FARSB   | Forward | 5'- GCCCTGTGCTCCCAAGAAGATA -3'  |
|         | Reverse | 5'- AGGAAGAAGGGTAGTGC GTGCC -3' |

| Gene      | siRNA   | Sequences                    |
|-----------|---------|------------------------------|
| SiFARSB#1 | Forward | 5'-GCAUGUGAU AUUGUAGAAGAU-3' |
|           | Reverse | 5'-AUCUUCUACAAUAUCACAUGC-3'  |
| SiFARSB#2 | Forward | 5'- GCUGGACAGAAUUAUGCAGUU-3' |
|           | Reverse | 5'- AACUGCAUAAUUCUGUCCAGC-3' |
| siControl | Forward | 5'- UUCUCCGAACGUGUCACGUTT-3' |
|           | Reverse | 5'- ACGUGACACGUUCGGAGAATT-3' |

| Gene      | Sequences                    |
|-----------|------------------------------|
| shFARSB#1 | 5'-GCAUGUGAU AUUGUAGAAGAU-3' |
| shFARSB#2 | 5'- GCUGGACAGAAUUAUGCAGUU-3' |
| shControl | 5'- UUCUCCGAACGUGUCACGUTT-3' |
